# Supplementary material for: Contribution of socio-demographic factors in prevalence of soil-transmitted helminth infections among newly arrived laborers in Jeddah, Saudi Arabia
Source: PeerJ. 2024 Oct 8;12:e18216. doi: 10.7717/peerj.18216 (PMC11468799; doi:10.7717/peerj.18216)
Supplement: Supplemental Information 1 [file peerj-12-18216-s001.xlsx]

## Sheet: Sheet1
#	Nat.	Age	W (kg)	H (cm)	Gend.	M Status	Resid.	Job	Edu.	Walk bare foot	Stool	MSD	MSR	PCR	PCR	MSD	MSR	Other
											Consis				type	type	type
1	Indian	27	80	175	M	Married	Others	Driver	Element	Yes	Formed	Neg	Neg	Neg
2	Bangladeshi	24	70	173	M	Unmarried	Others	Driver	Element	Yes	Soft	Neg	Neg	Neg
3	Indian	30	72	168	M	Married	Others	Driver	Interm	Yes	Formed	Neg	Neg	Neg
4	Pilipino	24	57	153	F	Married	Others	Hs-maid	Interm	No	Soft	Neg	Neg	Neg
5	Indian	29	61	157	F	Married	Others	Hs-maid	Element	Yes	Soft	Neg	Neg	Neg
6	Nigerian	26	88	179	M	Married	Others	Driver	Interm	No	Soft	Neg	Neg	Neg
7	Indian	26	58	156	F	Married	Others	Hs-maid	Interm	No	Soft	Neg	Neg	Neg
8	Pilipino	31	68	162	M	Married	Others	Worker	Interm	No	Soft	Neg	Neg	Neg
9	Indonesian	27	63	159	M	Married	Others	Driver	Illiterate	Yes	Soft	Neg	Pos	Pos	N. am		HW
10	Sudanese	32	83	187	M	Married	Alone	Chef	Element	No	Soft	Neg	Neg	Neg
11	Bangladeshi	22	51	150	F	Unmarried	Others	Hs-maid	Illiterate	Yes	Soft	Neg	Neg	Neg
12	Indian	26	73	175	M	Married	Others	Driver	Element	No	Soft	Neg	Neg	Neg
13	Nigerian	32	88	190	M	Married	Others	Driver	Illiterate	No	Formed	Neg	Neg	Neg
14	Pilipino	24	58	154	F	Unmarried	Others	Hs-maid	Element	No	Formed	Neg	Neg	Neg
15	Indian	27	78	183	M	Married	Others	Worker	Interm	Yes	Formed	Neg	Neg	Neg
16	Indian	28	74	180	M	Married	Others	Driver	Element	No	Soft	Neg	Neg	Neg
17	Bangladeshi	24	65	170	M	Unmarried	Others	Driver	Illiterate	Yes	Soft	Neg	Neg	Neg
18	Pilipino	26	58	156	F	Married	Others	Hs-maid	Interm	No	Soft	Neg	Neg	Neg
19	Bangladeshi	28	52	150	F	Unmarried	Others	Hs-maid	Element	No	Formed	Neg	Neg	Neg
20	Pilipino	22	51	158	F	Unmarried	Others	Hs-maid	Interm	Yes	Soft	Neg	Pos	Pos	A. du		HW
21	Indian	28	61	156	F	Married	Others	Hs-maid	Element	Yes	Soft	Neg	Neg	Neg
22	Pilipino	26	57	160	M	Unmarried	Others	Driver	Element	No	Formed	Neg	Neg	Neg
23	Pilipino	25	52	160	F	Unmarried	Others	Hs-maid	Interm	No	Soft	Neg	Neg	Neg
24	Pilipino	28	62	168	F	Married	Others	Hs-maid	Second	No	Soft	Neg	Neg	Neg
25	Sudanese	34	75	170	F	Married	Others	Babysit	Second	No	Soft	Neg	Neg	Neg
26	Sudanese	29	81	190	M	Married	Others	Shep	Illiterate	No	Soft	Neg	Neg	Neg
27	Bangladeshi	26	55	152	F	Unmarried	Others	Hs-maid	Illiterate	Yes	Soft	Neg	Neg	Neg
28	Sudanese	28	62	170	F	Married	Others	Babysit	Interm	No	Formed	Neg	Neg	Neg
29	Indian	27	65	170	M	Married	Others	Driver	Interm	Yes	Soft	Neg	Neg	Neg
30	Pilipino	23	58	160	M	Unmarried	Others	Hs-keep	Illiterate	No	Formed	Neg	Neg	Neg
31	Moroccan	29	58	162	F	Married	Others	Hs-maid	Interm	No	Soft	Neg	Neg	Neg
32	Moroccan	27	61	168	F	Married	Others	Hs-maid	Element	No	Formed	Neg	Neg	Neg
33	Sudanese	25	83	190	M	Unmarried	Others	Shep	Element	No	Soft	Neg	Neg	Neg
34	Indian	27	56	157	F	Married	Others	Hs-maid	Illiterate	Yes	Formed	Neg	Neg	Neg
35	Indian	22	50	153	F	Unmarried	Others	Hs-maid	Element	No	Soft	Neg	Neg	Neg
36	Egyptian	26	75	180	M	Married	Others	Driver	Interm	No	Formed	Neg	Neg	Neg
37	Somalian	29	61	172	F	Married	Others	Hs-maid	Element	No	Soft	Neg	Neg	Neg				E. coli
38	Bangladeshi	23	50	154	F	Unmarried	Others	Hs-maid	Illiterate	Yes	Formed	Neg	Pos	Pos	N. am		HW
39	Pilipino	27	58	156	M	Unmarried	Others	Driver	Interm	No	Soft	Neg	Neg	Neg
40	Sudanese	29	65	172	F	Married	Others	Babysit	Second	No	Soft	Neg	Neg	Neg
41	Indian	23	78	182	M	Unmarried	Others	Driver	Illiterate	Yes	Formed	Pos	Pos	Pos	N. am	HW	HW	B. hom
42	Indonesian	28	52	158	F	Married	Others	Cleaner	Illiterate	Yes	Soft	Neg	Neg	Neg
43	Ghana	27	68	173	F	Married	Others	Hs-maid	Illiterate	Yes	Soft	Neg	Neg	Neg
44	Indian	30	75	185	M	Married	Others	Driver	Interm	No	Formed	Pos	Pos	Pos	A. lu	A. lu	A. lu
45	Pilipino	23	51	153	F	Unmarried	Others	Hs-maid	Illiterate	Yes	Soft	Neg	Neg	Neg
46	Pilipino	25	57	162	F	Married	Others	Hs-maid	Element	No	Loose	Neg	Neg	Neg
47	Indian	28	75	180	M	Married	Others	Driver	Element	No	Formed	Neg	Neg	Neg
48	Sudanese	27	82	185	M	Married	Others	Shep	Illiterate	Yes	Soft	Neg	Neg	Neg
49	Bangladeshi	22	50	151	F	Unmarried	Others	Hs-maid	Illiterate	No	Soft	Neg	Neg	Neg
50	Indian	25	75	170	M	Married	Others	Driver	Illiterate	Yes	Soft	Neg	Neg	Neg
51	Pilipino	23	58	156	M	Unmarried	Others	Worker	Element	No	Soft	Neg	Neg	Neg
52	Moroccan	27	62	168	F	Unmarried	Others	Hs-maid	Element	No	Formed	Neg	Neg	Neg
53	Bangladeshi	21	56	163	M	Unmarried	Others	Worker	Illiterate	No	Soft	Neg	Neg	Neg
54	Indonesian	30	53	150	F	Married	Others	Hs-maid	Illiterate	Yes	Soft	Neg	Neg	Neg
55	Pilipino	29	63	158	F	Married	Others	Hs-maid	Interm	No	Formed	Neg	Pos	Pos	T. t, S. s		T. t
56	Sudanese	28	75	180	M	Married	Others	Shep	Element	No	Soft	Neg	Neg	Neg
57	Moroccan	23	70	175	F	Unmarried	Others	Hs-maid	Interm	No	Formed	Neg	Neg	Neg
58	Sri Lankan	25	78	170	M	Married	Others	Driver	Illiterate	No	Soft	Neg	Neg	Neg				E. coli
59	Indian	24	65	158	F	Married	Others	Hs-maid	Element	No	Soft	Neg	Neg	Neg
60	Pilipino	22	51	153	F	Unmarried	Others	Hs-maid	Illiterate	No	Formed	Neg	Neg	Neg
61	Sudanese	27	75	185	M	Married	Others	Hs-keep	Element	No	Soft	Neg	Neg	Neg
62	Moroccan	29	82	185	M	Married	Others	Worker	Interm	No	Loose	Neg	Neg	Neg
63	Indian	29	72	175	M	Married	Others	Driver	Element	No	Formed	Neg	Neg	Neg
64	Sudanese	26	80	192	M	Married	Others	Shep	Element	No	Loose	Neg	Neg	Neg
65	Moroccan	22	58	165	F	Unmarried	Others	Hs-maid	Illiterate	No	Formed	Neg	Neg	Neg
66	Pilipino	24	57	151	F	Unmarried	Others	Hs-maid	Illiterate	No	Soft	Neg	Pos	Pos	T. t		T. t
67	Nigerian	25	82	190	M	Married	Others	Hs-keep	Element	No	Soft	Pos	Pos	Pos	A. lu	A. lu	A. lu
68	Pilipino	29	62	170	F	Married	Others	Hs-maid	Interm	No	Soft	Neg	Neg	Neg
69	Pilipino	30	53	160	F	Married	Others	Hs-maid	Illiterate	Yes	Formed	Neg	Neg	Neg
70	Indian	32	57	164	F	Married	Others	Hs-maid	Illiterate	No	Soft	Neg	Neg	Neg				H. het
71	Sudanese	27	70	175	M	Unmarried	Others	Hs-keep	Illiterate	No	Formed	Neg	Neg	Neg
72	Indian	23	62	170	M	Married	Others	Driver	Illiterate	No	Soft	Neg	Neg	Neg
73	Egyptian	26	70	175	M	Unmarried	Others	Driver	Interm	No	Soft	Neg	Neg	Neg
74	Pilipino	27	60	165	F	Married	Others	Hs-maid	Element	No	Formed	Neg	Neg	Neg
75	Cambodian	26	60	155	F	Married	Others	Hs-maid	Illiterate	Yes	Formed	Neg	Neg	Neg
76	Pilipino	28	60	155	F	Married	Others	Hs-maid	Element	No	Soft	Neg	Neg	Neg
77	Indian	24	50	156	F	Unmarried	Others	Hs-maid	Illiterate	Yes	Formed	Neg	Neg	Neg
78	Sudanese	28	85	190	M	Married	Others	Shep	Illiterate	Yes	Formed	Neg	Neg	Neg
79	Moroccan	24	51	163	F	Unmarried	Others	Hs-maid	Element	No	Soft	Neg	Neg	Neg
80	Sudanese	29	75	180	M	Married	Others	Shep	Element	No	Soft	Neg	Neg	Neg
81	Pilipino	27	63	155	F	Married	Others	Hs-maid	Element	No	Formed	Neg	Neg	Neg
82	Pilipino	27	62	163	M	Unmarried	Others	Driver	Element	No	Soft	Neg	Neg	Neg
83	Pilipino	32	62	160	F	Married	Others	Hs-maid	Interm	No	Soft	Neg	Neg	Neg
84	Indian	26	70	165	M	Unmarried	Others	Driver	Illiterate	Yes	Soft	Pos	Pos	Pos	T. t	T. t	T. t	E. coli, I. but
85	Moroccan	28	72	175	F	Unmarried	Others	Hs-maid	Illiterate	No	Soft	Neg	Neg	Neg
86	Moroccan	28	70	175	F	Unmarried	Others	Hs-maid	Illiterate	No	Soft	Neg	Pos	Pos	T. t		T. t
87	Sudanese	23	80	185	M	Unmarried	Others	Driver	Element	Yes	Formed	Neg	Neg	Neg
88	Indian	21	65	170	M	Unmarried	Others	Driver	Illiterate	Yes	Formed	Neg	Neg	Neg
89	Bangladeshi	27	51	153	F	Married	Others	Hs-maid	Illiterate	Yes	Soft	Neg	Neg	Neg
90	Moroccan	26	72	175	F	Unmarried	Others	Hs-maid	Element	No	Soft	Neg	Neg	Neg
91	Pilipino	23	58	160	F	Married	Others	Hs-maid	Illiterate	No	Formed	Neg	Neg	Neg
92	Indian	27	65	170	M	Married	Others	Driver	Element	No	Soft	Neg	Neg	Neg
93	Moroccan	29	73	168	F	Unmarried	Others	Hs-maid	Illiterate	Yes	Soft	Neg	Neg	Neg
94	Bangladeshi	27	62	170	M	Married	Others	Driver	Illiterate	Yes	Formed	Neg	Neg	Neg
95	Sudanese	24	75	180	M	Married	Others	Shep	Element	No	Formed	Neg	Neg	Neg
96	Pilipino	25	61	158	F	Married	Others	Hs-maid	Illiterate	No	Soft	Neg	Neg	Neg				E. coli
97	Egyptian	25	70	175	M	Unmarried	Others	Driver	Interm	No	Soft	Neg	Neg	Neg
98	Sudanese	23	75	165	F	Unmarried	Others	Babysit	Second	No	Soft	Neg	Neg	Neg				H. n
99	Indian	30	70	165	M	Married	Others	Driver	Element	No	Formed	Neg	Neg	Neg
100	Pilipino	28	58	160	F	Married	Others	Hs-maid	Element	No	Formed	Neg	Neg	Neg
101	Indonesian	24	55	150	F	Unmarried	Others	Hs-maid	Illiterate	No	Soft	Neg	Neg	Neg
102	Indian	27	70	165	M	Married	Others	Driver	Illiterate	Yes	Formed	Neg	Neg	Neg				E. nana
103	Egyptian	25	70	175	M	Unmarried	Others	Driver	Interm	Yes	Soft	Neg	Pos	Pos	S. s		HW
104	Moroccan	28	58	162	F	Unmarried	Others	Hs-maid	Illiterate	Yes	Formed	Neg	Pos	Pos	S. s, A. du		HW, Rh
105	Pilipino	25	60	158	F	Unmarried	Others	Hs-maid	Illiterate	Yes	Soft	Neg	Neg	Pos	S. s
106	Pilipino	27	61	165	F	Married	Others	Hs-maid	Element	No	Formed	Neg	Neg	Neg
107	Bangladeshi	25	60	170	M	Unmarried	Others	Worker	Illiterate	No	Formed	Neg	Neg	Neg				E. coli
108	Pilipino	23	52	160	F	Unmarried	Others	Hs-maid	Interm	No	Formed	Neg	Neg	Neg
109	Indian	27	63	155	F	Unmarried	Others	Hs-maid	Illiterate	Yes	Soft	Neg	Neg	Neg
110	Sudanese	29	75	180	M	Married	Others	Driver	Interm	No	Soft	Neg	Neg	Neg
111	Sudanese	23	75	180	M	Unmarried	Others	Driver	Illiterate	Yes	Soft	Neg	Neg	Neg
112	Moroccan	26	58	165	F	Unmarried	Others	Hs-maid	Element	No	Formed	Neg	Neg	Neg
113	Indian	25	60	158	M	Married	Others	Driver	Illiterate	Yes	Soft	Neg	Neg	Neg
114	Pilipino	27	55	160	F	Married	Others	Hs-maid	Illiterate	No	Soft	Neg	Neg	Neg
115	Moroccan	28	57	158	F	Unmarried	Others	Hs-maid	Illiterate	No	Soft	Neg	Neg	Neg
116	Sudanese	30	78	185	M	Married	Others	Shep	Element	No	Formed	Neg	Neg	Neg
117	Sudanese	28	80	175	M	Married	Others	Shep	Element	No	Soft	Neg	Neg	Neg
118	Indonesian	27	58	160	F	Married	Others	Hs-maid	Illiterate	Yes	Soft	Neg	Neg	Neg
119	Indian	25	75	180	M	Married	Others	Driver	Element	Yes	Formed	Neg	Neg	Neg				E. coli
120	Sudanese	26	75	170	M	Unmarried	Others	Driver	Element	No	Formed	Neg	Neg	Neg
121	Pilipino	23	58	160	F	Unmarried	Others	Hs-maid	Illiterate	No	Formed	Pos	Pos	Pos	A. lu	A. lu	A. lu
122	Pilipino	25	60	158	F	Married	Others	Hs-maid	Element	Yes	Soft	Neg	Neg	Neg
123	Indian	25	60	165	M	Married	Others	Driver	Illiterate	Yes	Soft	Neg	Neg	Neg
124	Pilipino	27	55	165	F	Unmarried	Others	Hs-maid	Element	No	Soft	Neg	Neg	Neg
125	Sudanese	23	75	180	M	Unmarried	Others	Driver	Illiterate	Yes	Soft	Neg	Neg	Neg
126	Indian	29	60	158	M	Unmarried	Others	Driver	Element	No	Soft	Neg	Neg	Neg
127	Bangladeshi	28	50	155	F	Married	Others	Hs-maid	Illiterate	Yes	Soft	Neg	Neg	Neg
128	Pilipino	22	53	160	M	Unmarried	Others	Driver	Illiterate	Yes	Soft	Neg	Neg	Neg
129	Egyptian	22	75	180	M	Unmarried	Others	Driver	Interm	No	Soft	Neg	Neg	Neg
130	Pilipino	25	52	150	F	Unmarried	Others	Hs-maid	Illiterate	Yes	Formed	Neg	Neg	Neg
131	Egyptian	28	65	170	M	Married	Others	Driver	Interm	No	Formed	Neg	Neg	Neg
132	Indian	23	51	155	F	Unmarried	Others	Hs-maid	Illiterate	Yes	Soft	Neg	Pos	Pos	T. t, N. am		T. t, HW
133	Pilipino	24	55	150	F	Unmarried	Others	Hs-maid	Interm	Yes	Formed	Neg	Pos	Pos	T. t, N. am		T. t, HW
134	Pilipino	28	56	165	F	Married	Others	Hs-maid	Element	No	Soft	Neg	Neg	Neg				E. coli
135	Pilipino	27	65	170	F	Married	Others	Hs-maid	Illiterate	Yes	Formed	Neg	Neg	Neg
136	Pilipino	25	58	156	F	Unmarried	Others	Hs-maid	Interm	N	Soft	Neg	Neg	Neg
137	Indian	29	65	170	M	Married	Others	Driver	Illiterate	Yes	Soft	Neg	Neg	Neg
138	Indian	32	65	178	M	Married	Others	Driver	Element	N	Soft	Neg	Neg	Neg
139	Moroccan	25	60	175	F	Unmarried	Others	Hs-maid	Illiterate	Yes	Formed	Neg	Neg	Neg
140	Sudanese	23	75	185	M	Unmarried	Others	Shep	Illiterate	Yes	Formed	Neg	Neg	Neg
141	Moroccan	28	58	165	F	Unmarried	Others	Hs-maid	Element	No	Soft	Neg	Neg	Neg				E. his, B. hom
142	Pilipino	27	50	155	F	Married	Others	Hs-maid	Illiterate	Yes	Soft	Neg	Neg	Neg				G. lam
143	Indian	29	65	160	M	Married	Others	Driver	Element	No	Formed	Neg	Neg	Neg
144	Pilipino	27	62	165	F	Married	Others	Hs-maid	Interm	No	Soft	Neg	Neg	Neg
145	Pilipino	21	50	155	F	Unmarried	Others	Hs-maid	Illiterate	No	Soft	Neg	Neg	Neg
146	Indian	30	70	175	M	Married	Others	Driver	Interm	No	Formed	Neg	Neg	Neg
147	Egyptian	22	65	170	M	Married	Others	Driver	Interm	No	Formed	Neg	Neg	Neg
148	Bangladeshi	25	50	155	F	Married	Others	Hs-maid	Illiterate	No	Soft	Neg	Neg	Neg
149	Moroccan	25	57	162	F	Unmarried	Others	Hs-maid	Illiterate	No	Formed	Neg	Neg	Neg				E. coli
150	Sudanese	24	80	175	M	Unmarried	Others	Shep	Illiterate	No	Soft	Neg	Neg	Neg
151	Pilipino	25	60	155	F	Married	Others	Hs-maid	Element	No	Soft	Neg	Neg	Neg
152	Pilipino	28	56	160	F	Married	Others	Hs-maid	Interm	No	Soft	Neg	Neg	Neg				G. lam
153	Indian	25	65	170	M	Married	Others	Driver	Illiterate	Yes	Soft	Neg	Neg	Neg
154	Indian	29	65	167	M	Married	Others	Driver	Illiterate	Yes	Formed	Neg	Neg	Neg
155	Indonesian	24	50	155	F	Unmarried	Others	Hs-maid	Illiterate	Yes	Formed	Neg	Neg	Neg
156	Indian	22	60	155	F	Unmarried	Others	Hs-maid	Illiterate	Yes	Formed	Neg	Neg	Neg
157	Sudanese	27	75	180	M	Married	Others	Driver	Element	No	Formed	Pos	Pos	Pos	A. lu	A. lu	A. lu
158	Pilipino	25	60	155	F	Unmarried	Others	Hs-maid	Illiterate	Yes	Soft	Neg	Neg	Neg
159	Pilipino	28	55	160	F	Married	Others	Hs-maid	Element	Yes	Formed	Neg	Neg	Neg
160	Indian	21	65	160	M	Unmarried	Others	Driver	Interm	No	Formed	Neg	Neg	Neg				E. his
161	Egyptian	23	70	165	M	Unmarried	Others	Driver	Illiterate	No	Formed	Neg	Neg	Neg
162	Moroccan	28	55	150	F	Unmarried	Others	Hs-maid	Illiterate	No	Soft	Neg	Neg	Neg
163	Pilipino	27	58	165	F	Unmarried	Others	Hs-maid	Illiterate	No	Formed	Neg	Neg	Neg				E. coli, E. his
164	Indian	25	52	160	F	Married	Others	Hs-maid	Element	No	Soft	Neg	Neg	Neg
165	Indian	27	65	170	M	Married	Others	Driver	Illiterate	Yes	Soft	Neg	Neg	Neg
166	Moroccan	29	65	175	F	Unmarried	Others	Hs-maid	Illiterate	Yes	Soft	Neg	Neg	Neg
167	Sudanese	32	80	190	M	Married	Others	Shep	Element	No	Soft	Neg	Neg	Neg
168	Moroccan	24	55	165	F	Unmarried	Others	Hs-maid	Illiterate	No	Soft	Neg	Neg	Neg
169	Sudanese	27	76	185	M	Unmarried	Others	Driver	Illiterate	Yes	Soft	Neg	Neg	Neg
170	Pilipino	21	50	165	F	Unmarried	Others	Hs-maid	Element	No	Formed	Neg	Neg	Neg				B. hom
171	Pilipino	25	60	155	F	Married	Others	Hs-maid	Illiterate	Yes	Formed	Pos	Pos	Pos	N. am	HW	HW	E. his
172	Indian	24	65	170	M	Married	Others	Driver	Interm	Yes	Soft	Neg	Neg	Neg
173	Pilipino	23	55	150	F	Unmarried	Others	Hs-maid	Illiterate	No	Soft	Neg	Neg	Neg
174	Egyptian	26	70	165	M	Unmarried	Others	Driver	Interm	No	Soft	Neg	Neg	Neg
175	Pilipino	27	58	165	F	Married	Others	Hs-maid	Element	No	Formed	Neg	Neg	Neg
176	Indian	22	75	170	M	Unmarried	Others	Driver	Illiterate	No	Formed	Neg	Neg	Neg
177	Pilipino	25	55	160	F	Unmarried	Others	Hs-maid	Illiterate	No	Soft	Neg	Neg	Neg
178	Pilipino	30	60	155	F	Married	Others	Hs-maid	Element	Yes	Soft	Neg	Neg	Neg
179	Indian	22	75	165	M	Married	Others	Driver	Illiterate	Yes	Soft	Neg	Pos	Pos	T. t		T.t
180	Egyptian	23	70	160	M	Married	Others	Driver	Interm	No	Formed	Neg	Neg	Neg
181	Sudanese	24	75	180	M	Married	Others	Shep	Element	No	Formed	Neg	Neg	Neg
182	Pilipino	27	60	155	F	Unmarried	Others	Hs-maid	Illiterate	Yes	Soft	Neg	Neg	Neg
183	Indonesian	28	52	155	F	Married	Others	Hs-maid	Element	No	Formed	Neg	Neg	Neg
184	Pilipino	25	57	165	F	Married	Others	Hs-maid	Element	No	Formed	Neg	Neg	Neg
185	Pilipino	21	50	155	F	Unmarried	Others	Hs-maid	Illiterate	Yes	Soft	Neg	Neg	Neg
186	Moroccan	23	65	170	F	Married	Others	Hs-maid	Interm	No	Soft	Neg	Neg	Neg
187	Indian	24	68	175	M	Unmarried	Others	Driver	Illiterate	Yes	Soft	Neg	Neg	Neg
188	Moroccan	28	55	160	F	Unmarried	Others	Hs-maid	Illiterate	No	Formed	Neg	Neg	Neg
